# Supplementary material for: Associations of maternal upper respiratory tract infection/influenza during early pregnancy with congenital heart disease in offspring: evidence from a case-control study and meta-analysis
Source: Springer Nature journal article supplement (doi:10.1186/s12872-019-1206-0), 2019-12-01
Supplement: MOESM2 [file 17459640]

**Table S1** The description of characteristics by CHD Cases vs. Controls (n, %) ----Propensity-score-matched

|                                                  | All CHD <sup>a</sup> |                     |                   | Simple CHD <sup>a</sup> |                     |                   | Complex CHD <sup>a</sup> |                     |                   | VSD <sup>a</sup> |                    |                   | TOF <sup>a</sup> |                     |                   |
|--------------------------------------------------|----------------------|---------------------|-------------------|-------------------------|---------------------|-------------------|--------------------------|---------------------|-------------------|------------------|--------------------|-------------------|------------------|---------------------|-------------------|
|                                                  | Cases<br>(n=231)     | Controls<br>(n=231) | <i>p</i><br>value | Cases<br>(n=187)        | Controls<br>(n=187) | <i>p</i><br>value | Cases<br>(n=186)         | Controls<br>(n=186) | <i>p</i><br>value | Cases<br>(n=56)  | Controls<br>(n=98) | <i>p</i><br>value | Cases<br>(n=89)  | Controls<br>(n=149) | <i>p</i><br>value |
| <b>Demographic and obstetric characteristics</b> |                      |                     |                   |                         |                     |                   |                          |                     |                   |                  |                    |                   |                  |                     |                   |
| Maternal ethnic                                  |                      |                     | 0.360             |                         |                     | 1.000             |                          |                     | 0.557             |                  |                    | 0.971             |                  |                     | 0.926             |
| Han                                              | 227, 98.3            | 224, 97.0           |                   | 180, 96.3               | 180, 96.3           |                   | 179, 96.2                | 181, 97.3           |                   | 54, 96.4         | 93, 94.9           |                   | 87, 97.8         | 144, 96.6           |                   |
| Other                                            | 4, 1.7               | 7, 3.0              |                   | 7, 3.7                  | 7, 3.7              |                   | 7, 3.8                   | 5, 2.7              |                   | 2, 3.6           | 5, 5.1             |                   | 2, 2.2           | 5, 3.4              |                   |
| Maternal age at delivery                         |                      |                     | 0.873             |                         |                     | 1.000             |                          |                     | 0.375             |                  |                    | 0.776             |                  |                     | 0.945             |
| <35 years old                                    | 209, 90.5            | 210, 90.9           |                   | 172, 92.0               | 172, 92.0           |                   | 171, 91.9                | 166, 89.2           |                   | 50, 89.3         | 86, 87.8           |                   | 81, 91.0         | 136, 91.3           |                   |
| ≥35 years old                                    | 22, 9.5              | 21, 9.1             |                   | 15, 8.0                 | 15, 8.0             |                   | 15, 8.1                  | 20, 10.8            |                   | 6, 10.7          | 12, 12.2           |                   | 8, 9.0           | 13, 8.7             |                   |
| Maternal education                               |                      |                     | 0.630             |                         |                     | 0.866             |                          |                     | 0.294             |                  |                    | 0.855             |                  |                     | 0.678             |
| Middle school and below                          | 67, 29.0             | 58, 25.1            |                   | 48, 25.7                | 51, 27.3            |                   | 65, 34.9                 | 52, 28.0            |                   | 19, 33.9         | 29, 29.6           |                   | 33, 37.1         | 47, 31.5            |                   |
| High school                                      | 44, 19.0             | 48, 20.8            |                   | 44, 23.5                | 40, 21.4            |                   | 33, 17.7                 | 41, 22.0            |                   | 8, 14.3          | 15, 15.3           |                   | 23, 25.8         | 41, 27.5            |                   |
| College and above                                | 120, 51.9            | 125, 54.1           |                   | 95, 50.8                | 96, 51.3            |                   | 88, 47.3                 | 93, 50.0            |                   | 29, 51.8         | 54, 55.1           |                   | 33, 37.1         | 61, 40.9            |                   |
| Marital status                                   |                      |                     | 0.760             |                         |                     | 1.000             |                          |                     | 1.000             |                  |                    | -                 |                  |                     | 1.000             |
| Married                                          | 225, 97.4            | 226, 97.8           |                   | 184, 98.4               | 184, 98.4           |                   | 182, 97.8                | 182, 97.8           |                   | 56, 100.0        | 98, 100.0          |                   | 86, 96.6         | 144, 96.6           |                   |
| Unmarried/divorced/widowed                       | 6, 2.6               | 5, 2.2              |                   | 3, 1.6                  | 3, 1.6              |                   | 4, 2.2                   | 4, 2.2              |                   | 0, 0             | 0, 0               |                   | 3, 3.4           | 5, 3.4              |                   |
| Residence                                        |                      |                     | 0.261             |                         |                     | 0.408             |                          |                     | 0.604             |                  |                    | 0.715             |                  |                     | 0.362             |
| Urban                                            | 123, 53.2            | 135, 58.4           |                   | 87, 46.5                | 95, 50.8            |                   | 86, 46.2                 | 91, 48.9            |                   | 28, 50.0         | 52, 53.1           |                   | 37, 41.6         | 71, 47.7            |                   |
| Suburban /rural                                  | 108, 46.8            | 96, 41.6            |                   | 100, 53.2               | 92, 49.2            |                   | 100, 53.8                | 95, 51.1            |                   | 28, 50.0         | 46, 46.9           |                   | 52, 58.4         | 78, 52.3            |                   |
| Maternal prepregnancy obesity                    |                      |                     | 0.805             |                         |                     | 0.760             |                          |                     | 0.359             |                  |                    | 0.962             |                  |                     | 0.829             |
| Yes                                              | 8, 3.5               | 9, 3.9              |                   | 6, 3.2                  | 5, 2.7              |                   | 4, 2.2                   | 7, 3.8              |                   | 2, 3.6           | 2, 2.0             |                   | 6, 6.7           | 9, 6.0              |                   |
| No                                               | 223, 96.5            | 222, 96.1           |                   | 181, 96.8               | 182, 97.3           |                   | 182, 97.8                | 179, 96.2           |                   | 54, 96.4         | 96, 98.0           |                   | 83, 93.3         | 140, 94.0           |                   |
| Multiple births                                  |                      |                     | 0.517             |                         |                     | 0.673             |                          |                     | 0.293             |                  |                    | 0.926             |                  |                     | 0.425             |
| Yes                                              | 19, 8.2              | 23, 10.0            |                   | 13, 7.0                 | 11, 5.9             |                   | 15, 8.1                  | 21, 11.3            |                   | 3, 5.4           | 7, 7.1             |                   | 14, 15.7         | 18, 12.1            |                   |
| No                                               | 212, 91.8            | 208, 90.0           |                   | 174, 93.0               | 176, 94.1           |                   | 171, 91.9                | 165, 88.7           |                   | 53, 94.6         | 91, 92.9           |                   | 75, 84.3         | 131, 87.9           |                   |

|                                                 |           |           |       |           |           |  |           |           |       |           |           |          |           |
|-------------------------------------------------|-----------|-----------|-------|-----------|-----------|--|-----------|-----------|-------|-----------|-----------|----------|-----------|
| Infant gender                                   |           |           | 0.101 |           | 0.836     |  | 0.085     |           | 0.692 |           | 0.404     |          |           |
| Male                                            | 155, 67.1 | 138, 59.7 |       | 98, 52.4  | 100, 53.5 |  | 126, 67.7 | 110, 59.1 |       | 31, 55.4  | 51, 52.0  | 58, 65.2 | 89, 59.7  |
| Female                                          | 76, 32.9  | 93, 40.3  |       | 89, 47.6  | 87, 46.5  |  | 60, 32.3  | 76, 40.9  |       | 25, 44.6  | 47, 48.0  | 31, 34.8 | 60, 40.3  |
| Family history of CHD                           |           |           | 0.313 |           | 0.500     |  | 0.760     |           | 0.656 |           | 1.000     |          |           |
| Yes                                             | 3, 1.3    | 6, 2.6    |       | 3, 1.6    | 6, 3.2    |  | 5, 2.7    | 6, 3.2    |       | 4, 7.1    | 4, 4.1    | 3, 3.4   | 5, 3.4    |
| No                                              | 228, 98.7 | 225, 97.4 |       | 184, 98.4 | 181, 96.8 |  | 181, 97.3 | 180, 96.8 |       | 52, 92.9  | 94, 95.9  | 86, 96.6 | 144, 96.6 |
| <b>Maternal health indicators and behaviors</b> |           |           |       |           |           |  |           |           |       |           |           |          |           |
| Diabetes/hypertension                           |           |           | 1.000 |           | 1.000     |  | 1.000     |           | -     |           |           |          | 0.925     |
| Yes                                             | 5, 2.2    | 5, 2.2    |       | 2, 1.1    | 1, 0.5    |  | 4, 2.2    | 5, 2.7    |       | 56, 100.0 | 98, 100.0 | 4, 4.5   | 5, 3.4    |
| No                                              | 226, 97.8 | 226, 97.8 |       | 185, 98.9 | 186, 99.5 |  | 182, 97.8 | 181, 97.3 |       | 0, 0      | 0, 0      | 85, 95.5 | 144, 96.6 |
| Folic acid supplementation                      |           |           | 0.708 |           | 0.518     |  | 0.453     |           | 0.611 |           | 0.668     |          |           |
| Yes                                             | 194, 84.0 | 191, 82.7 |       | 147, 78.6 | 152, 81.3 |  | 142, 76.3 | 148, 79.6 |       | 42, 75.0  | 77, 78.6  | 69, 77.5 | 119, 79.9 |
| No                                              | 37, 16.0  | 40, 17.3  |       | 40, 21.4  | 35, 18.7  |  | 44, 23.7  | 38, 20.4  |       | 14, 25.0  | 21, 21.4  | 20, 22.5 | 30, 20.1  |
| Smoking/drinking                                |           |           | 0.644 |           | 0.863     |  | 0.304     |           | 0.516 |           | 0.952     |          |           |
| Yes                                             | 25, 10.8  | 22, 9.5   |       | 18, 9.6   | 19, 10.2  |  | 16, 8.6   | 22, 11.8  |       | 7, 12.5   | 9, 9.2    | 14, 15.7 | 23, 15.4  |
| No                                              | 206, 89.2 | 209, 90.5 |       | 169, 90.4 | 168, 89.8 |  | 170, 91.4 | 164, 88.2 |       | 49, 87.5  | 89, 90.8  | 75, 84.3 | 126, 84.6 |

<sup>a</sup> Controls were matched to cases based on propensity-score-matched analysis.

**Table S2** Associations of maternal upper respiratory tract infection/ influenza during early pregnancy with congenital heart disease in offspring ---after a propensity-score-matched analysis

|                    | Upper respiratory tract infection/ influenza (Propensity-score-matched) |                                   |                                   |
|--------------------|-------------------------------------------------------------------------|-----------------------------------|-----------------------------------|
|                    | Crude OR (95% CI)                                                       | Adjusted OR (95% CI) <sup>a</sup> | Adjusted OR (95% CI) <sup>b</sup> |
| <b>All CHD</b>     | <b>2.85 (1.76-4.61) ***</b>                                             | <b>2.86 (1.75-4.66) ***</b>       | <b>2.90 (1.77-4.74) ***</b>       |
| <b>Simple CHD</b>  | <b>3.47 (2.00-6.01) ***</b>                                             | <b>3.55 (2.03-6.23) ***</b>       | <b>3.56 (2.03-6.25) ***</b>       |
| VSD                | <b>3.08 (1.40-6.80) **</b>                                              | <b>3.35 (1.45-7.71) **</b>        | <b>3.40 (1.46-7.90) **</b>        |
| <b>Complex CHD</b> | <b>2.28 (1.33-3.92) **</b>                                              | <b>2.30 (1.32-4.02) **</b>        | <b>2.23 (1.27-3.91) **</b>        |
| TOF                | <b>3.38 (1.72-6.66) ***</b>                                             | <b>3.35 (1.66-6.73) **</b>        | <b>3.39 (1.67-6.86) **</b>        |

<sup>a</sup> Model I: adjusted for maternal ethnic, maternal age at delivery, maternal education, marital status, residence, maternal prepregnancy obesity, multiple births, infant gender, and family history of CHD.

<sup>b</sup> Model II: based on Model I, further adjusted for prepregnancy diabetes/hypertension, folic acid use, and smoking/drinking.

\*  $p$  value <0.05; \*\*  $p$  value <0.01; \*\*\*  $p$  value <0.001

**Table S3** The results of Begg's test and Egger's linear regression test for the association of maternal upper respiratory tract infection/influenza and CHD/simple CHD/complex CHD

| CHD         | Begg test       | Egger test         |
|-------------|-----------------|--------------------|
| CHD         | z=1.36, p=0.173 | t=2.17, p=0.046    |
| Simple CHD  | z=0.49, p=0.626 | t=0.29, p=0.776    |
| Complex CHD | z=0.50, p=0.620 | t= - 0.33, p=0.743 |

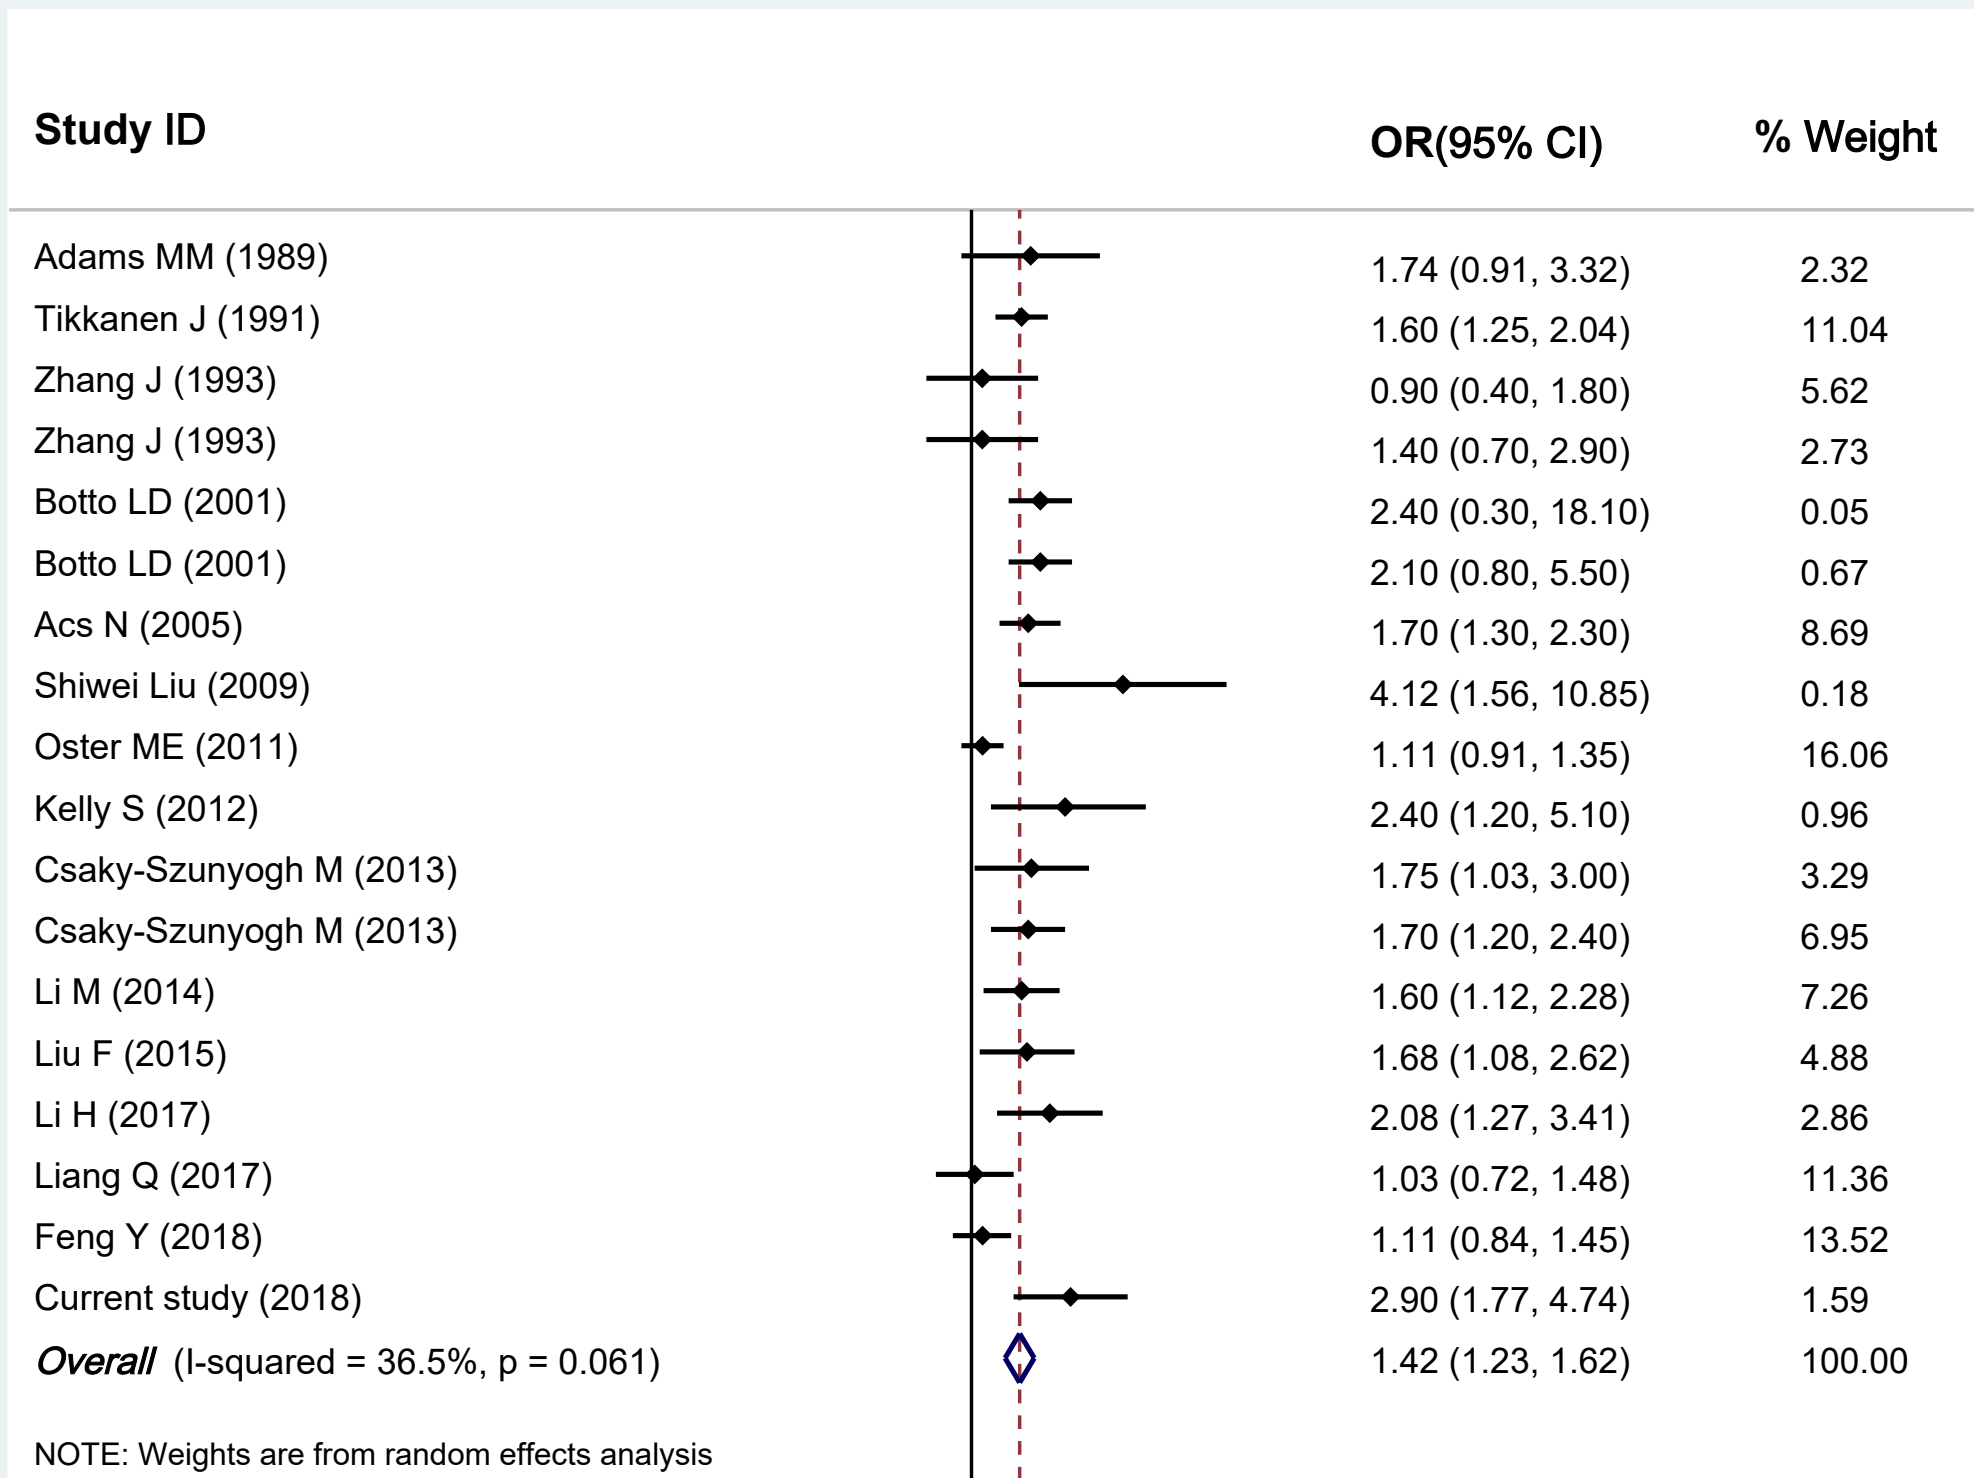

**Figure S1** Forest plot of ORs and 95% CIs for the association of maternal upper respiratory tract infection/influenza and CHD--- after a propensity-score-matched analysis

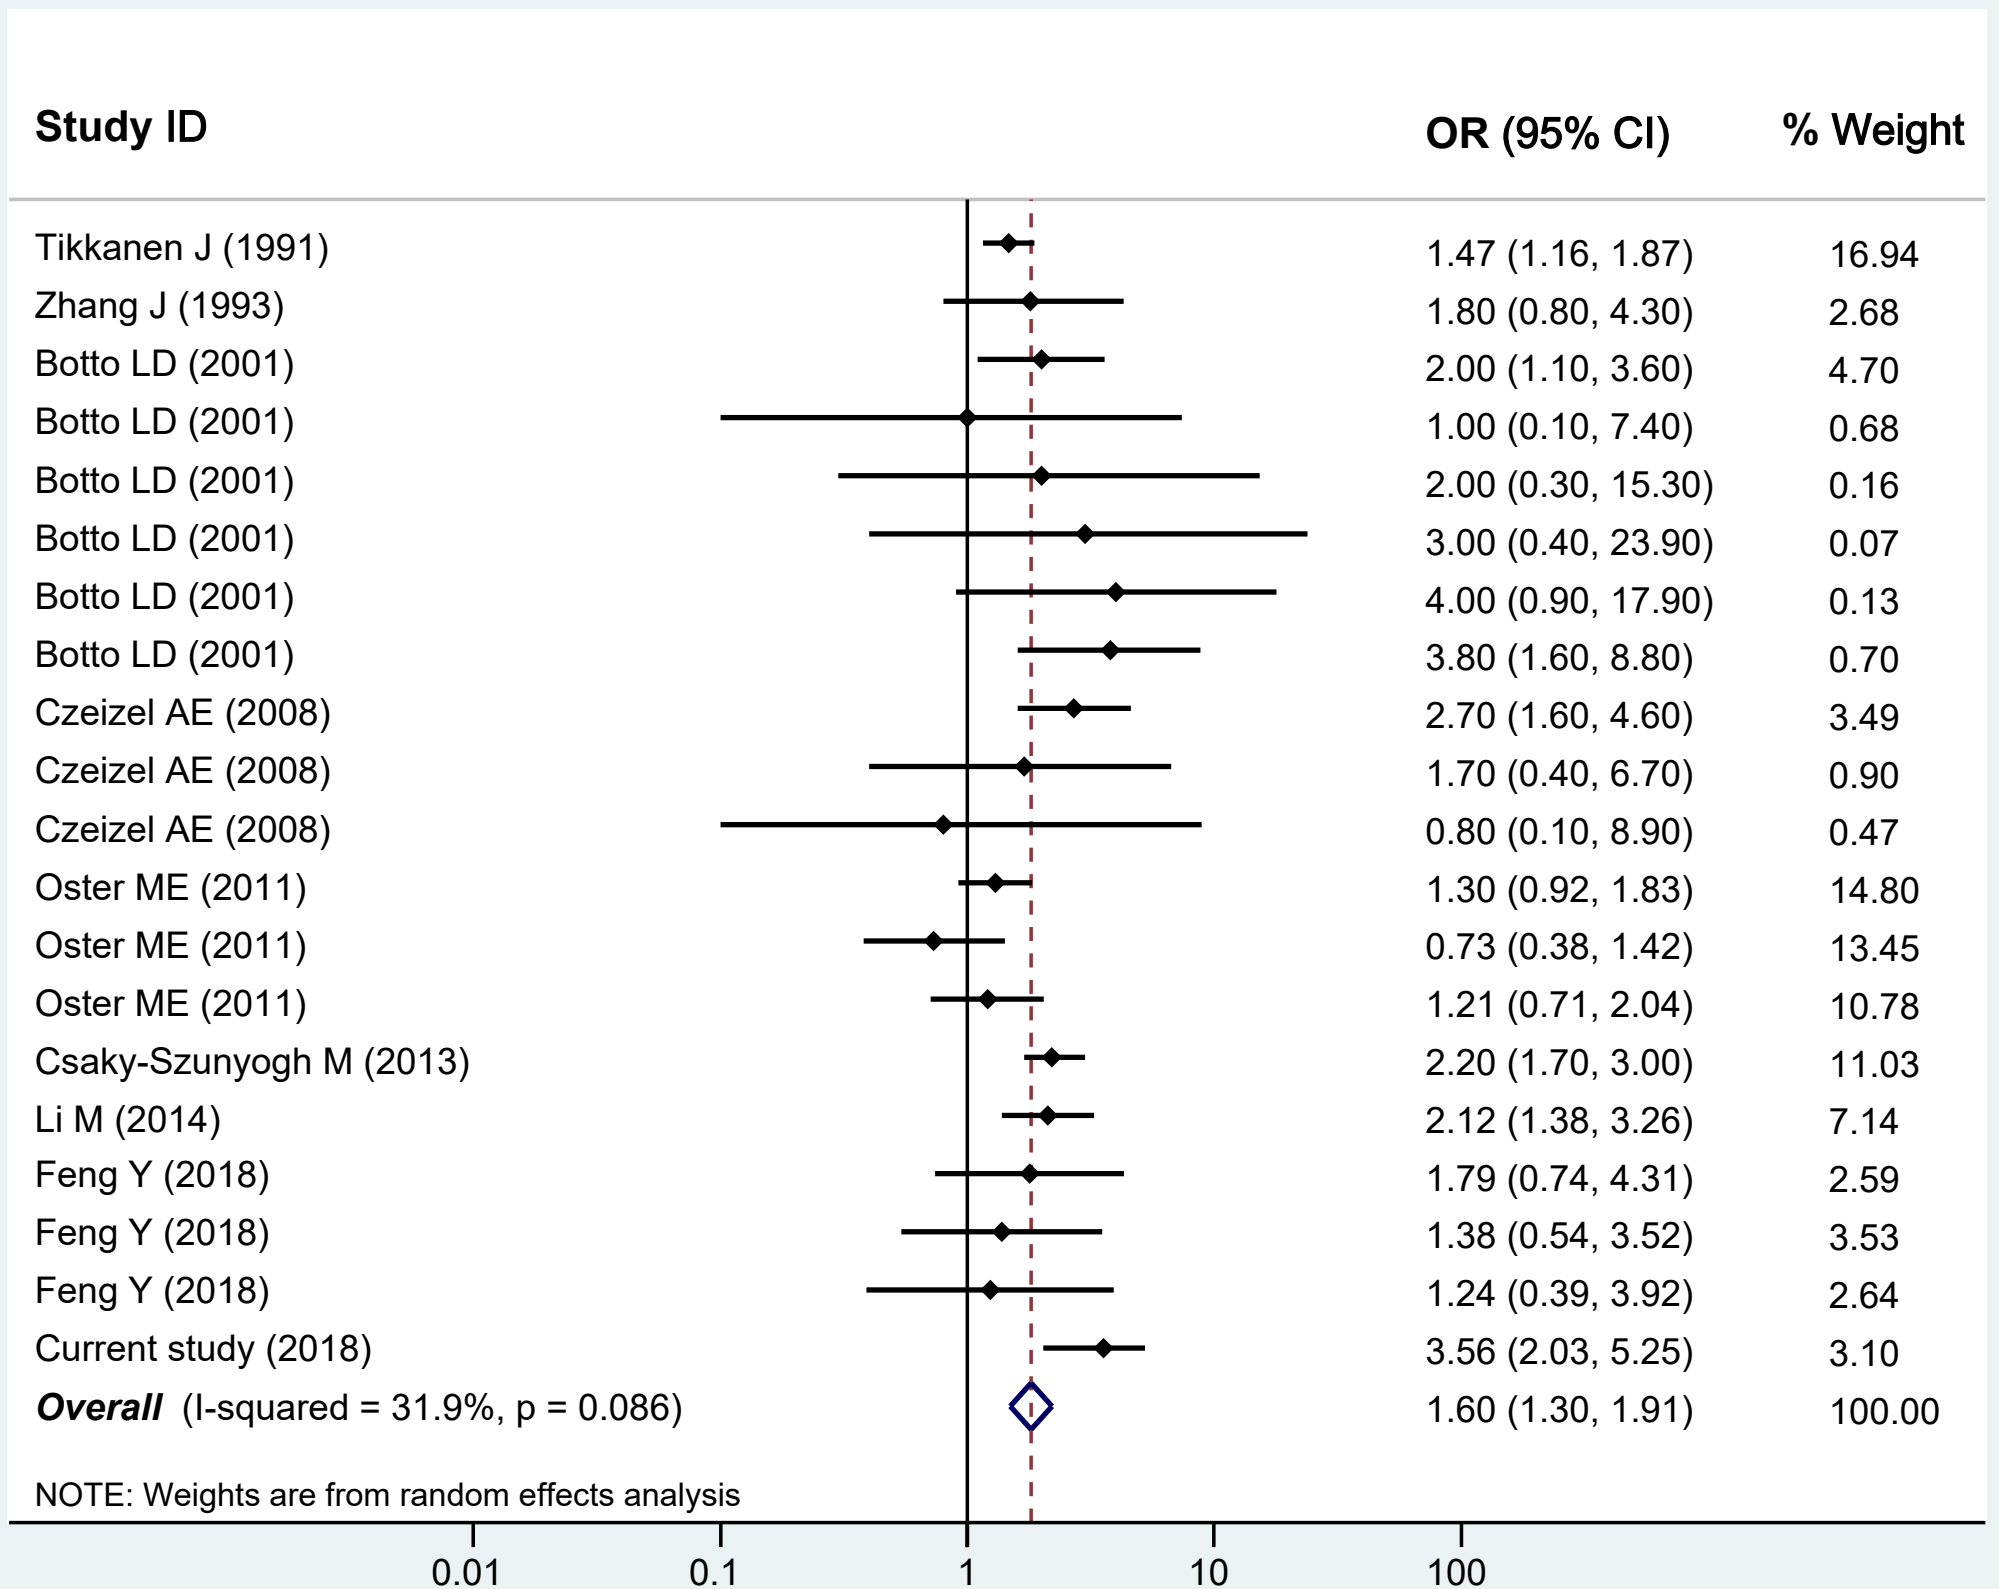

**Figure S2** Forest plot of ORs and 95% CIs for the association of maternal upper respiratory tract infection/influenza and simple CHD--- after a propensity-score-matched analysis

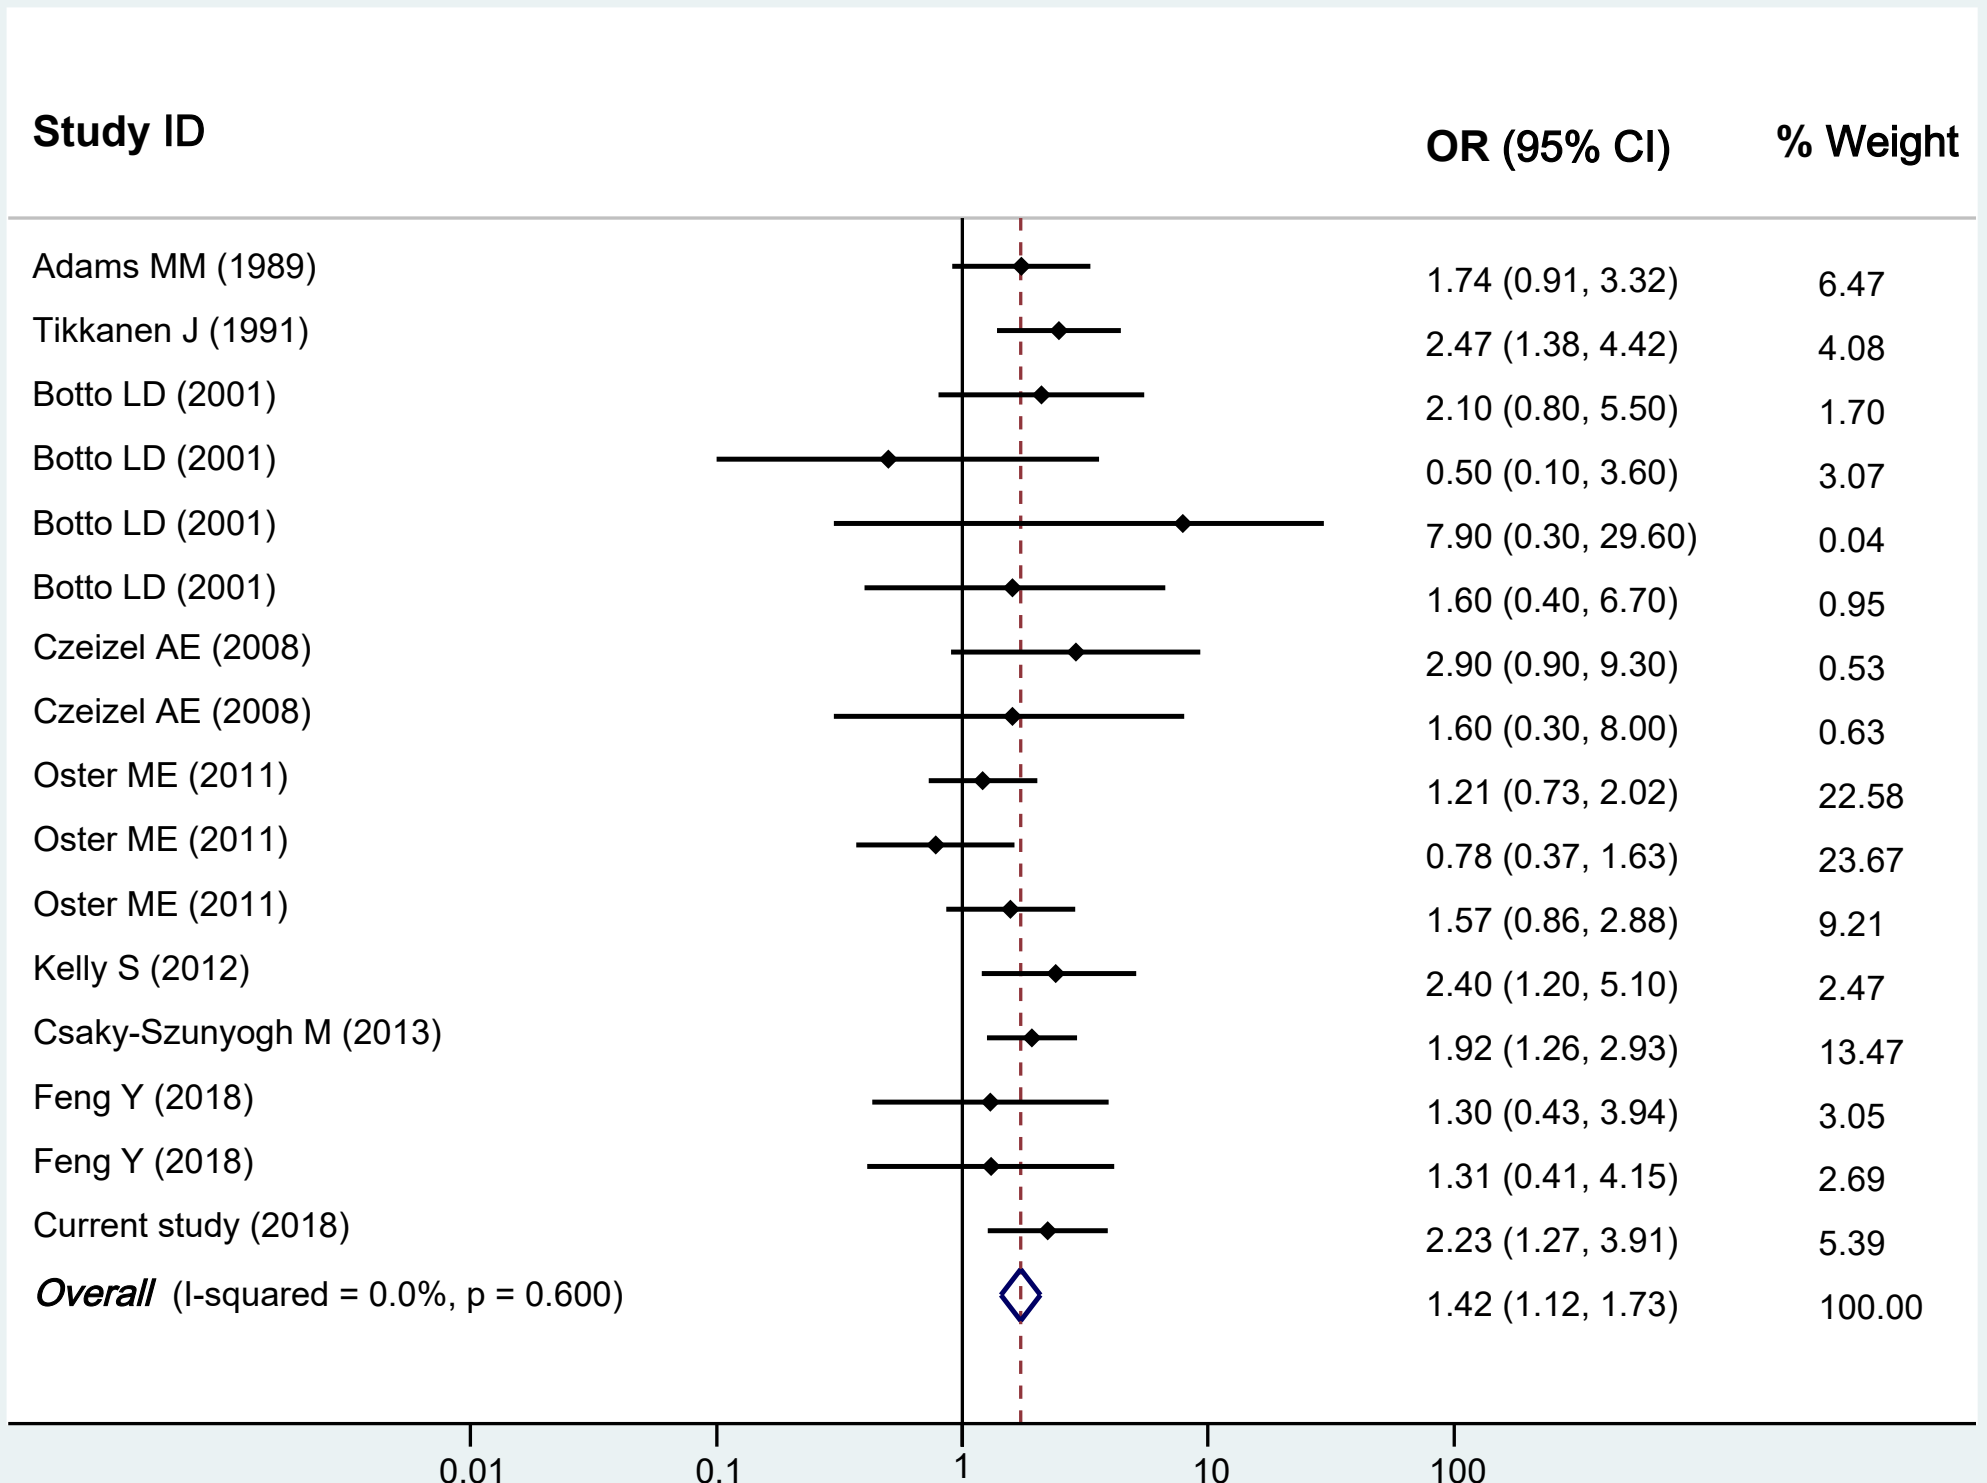

**Figure S3** Forest plot of ORs and 95% CIs for the association of maternal upper respiratory tract infection/influenza and complex CHD--- after a propensity-score-matched analysis

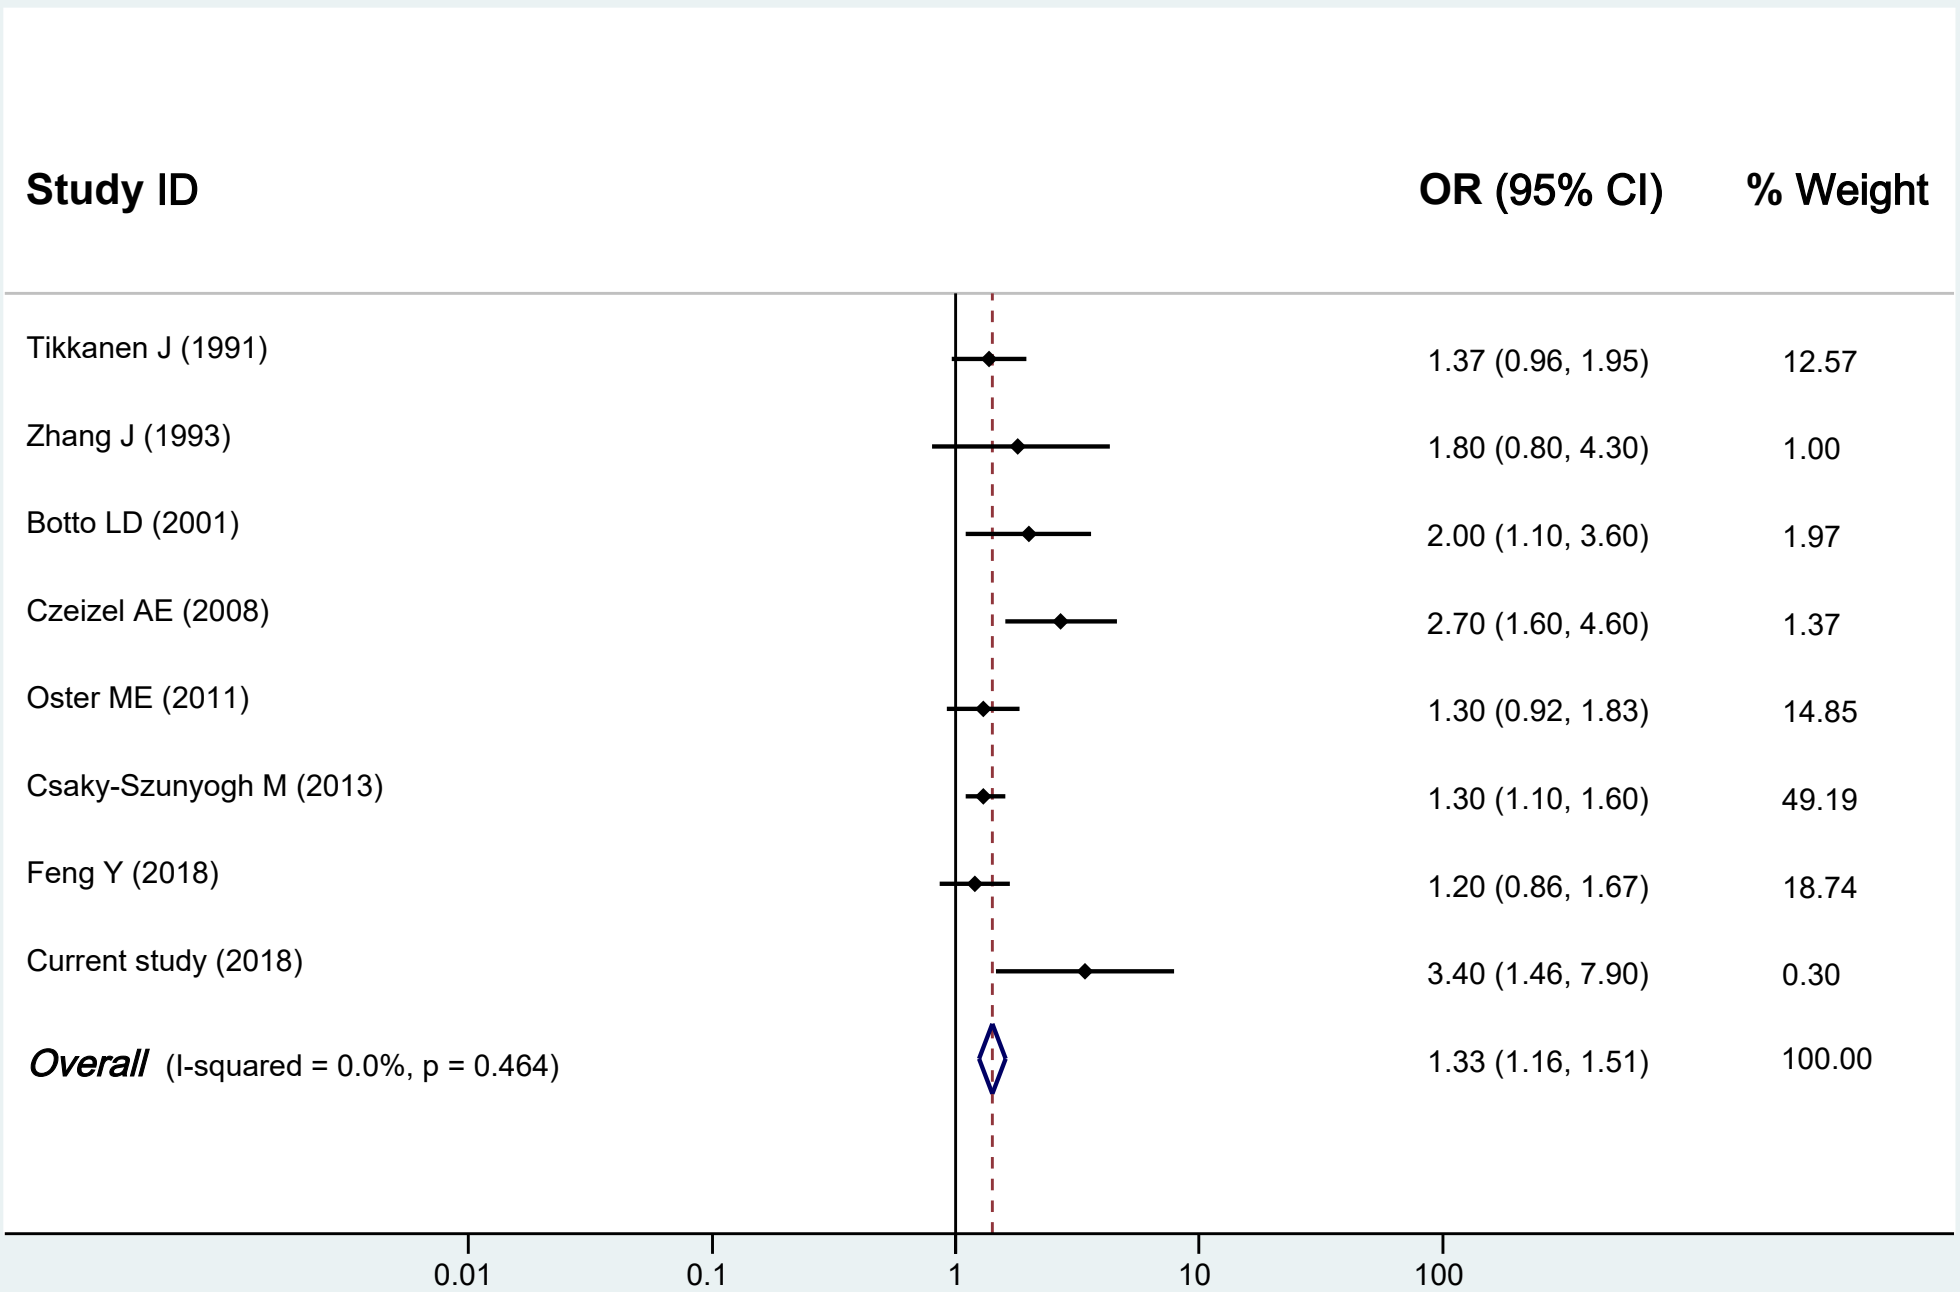

**Figure S4** Forest plot of ORs and 95% CIs for the association of maternal upper respiratory tract infection/influenza and VSD--- after a propensity-score-matched analysis

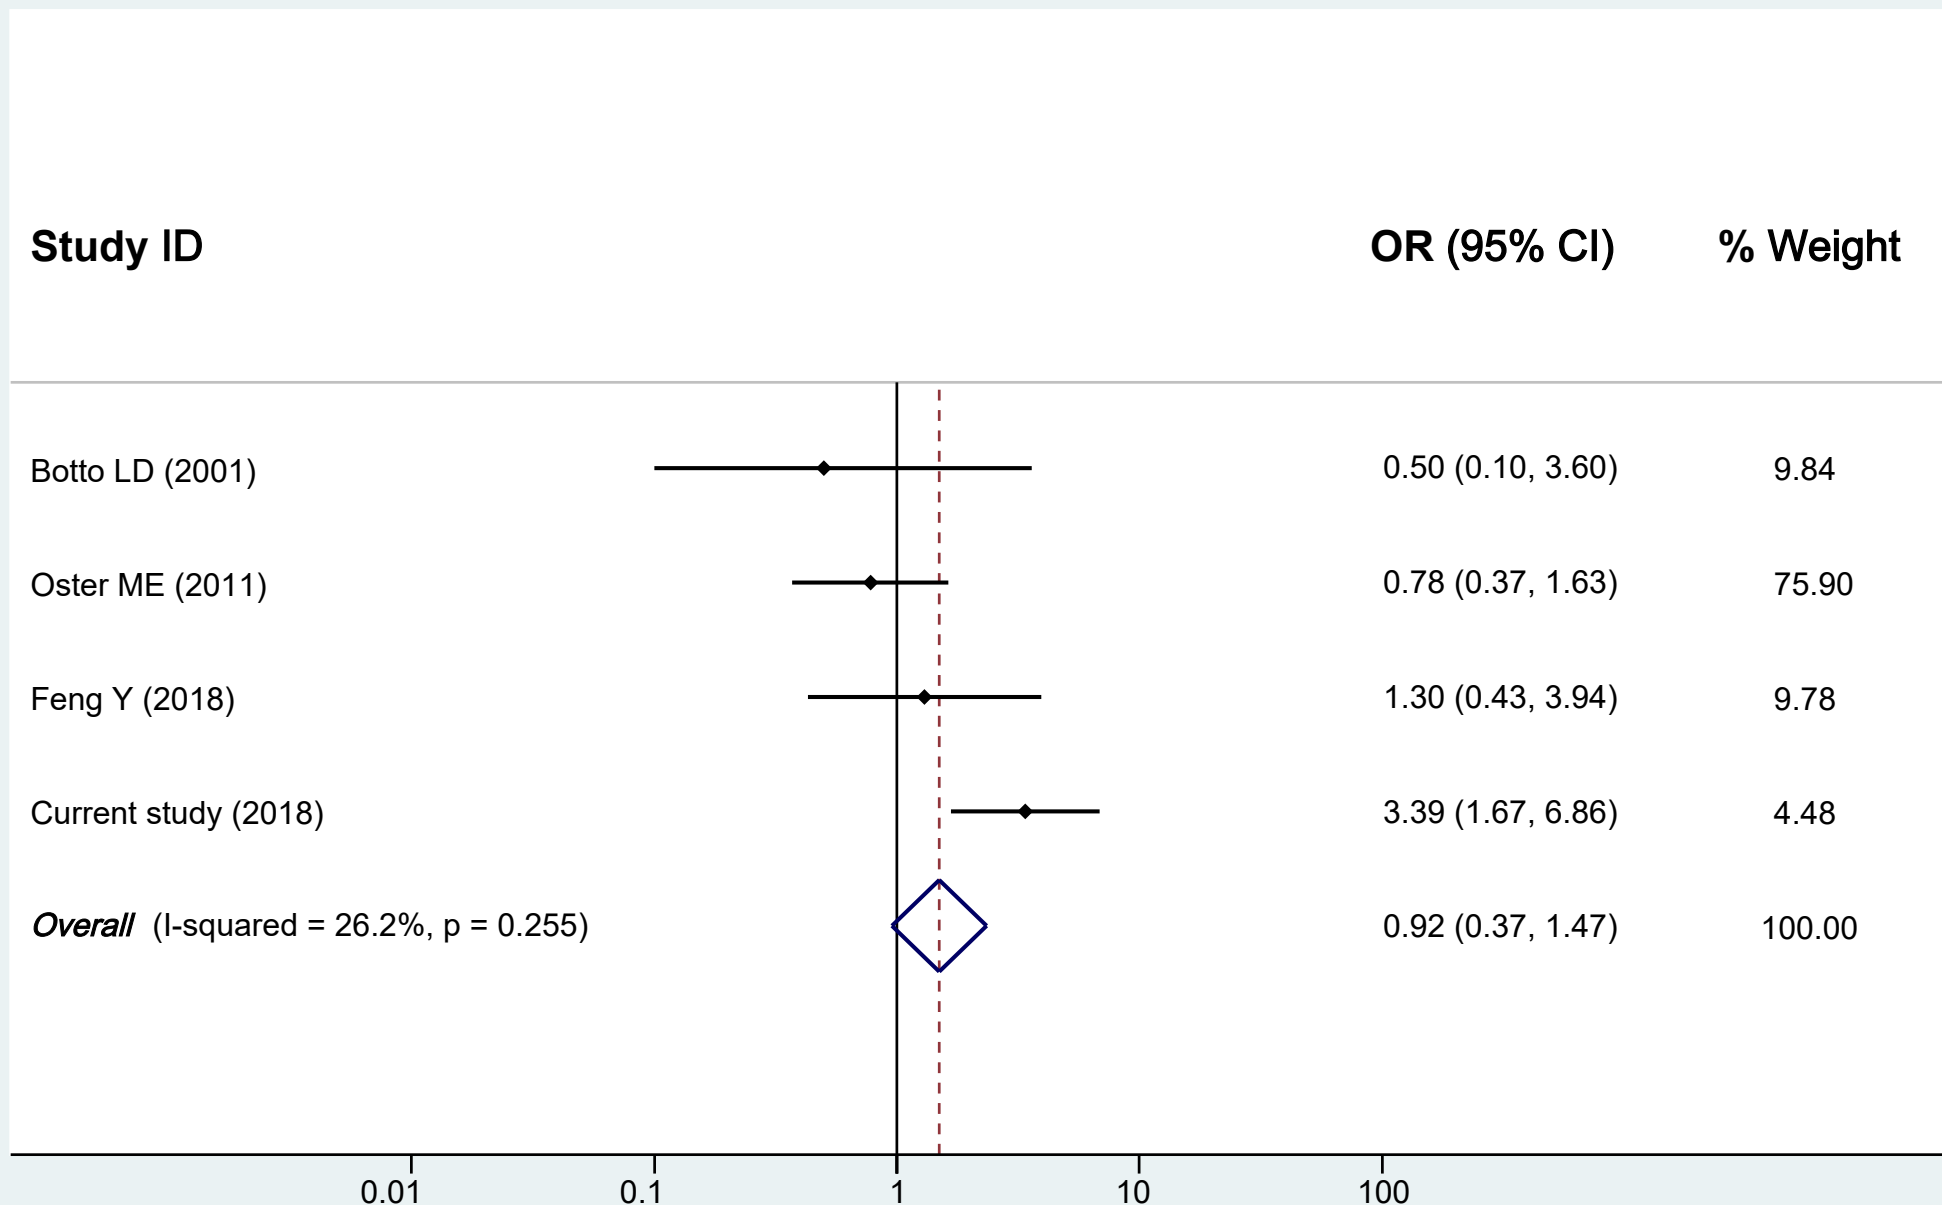

**Figure S5** Forest plot of ORs and 95% CIs for the association of maternal upper respiratory tract infection/influenza and TOF--- after a propensity-score-matched analysis





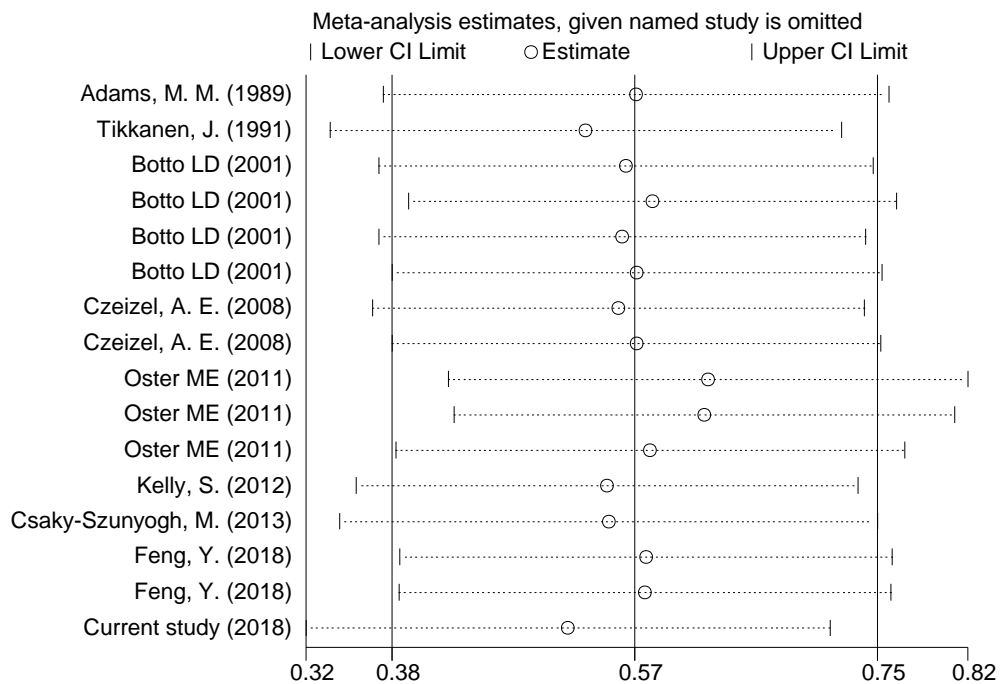

**Figure S8** Plot of sensitivity analysis for the association of maternal upper respiratory tract infection/influenza and complex CHD

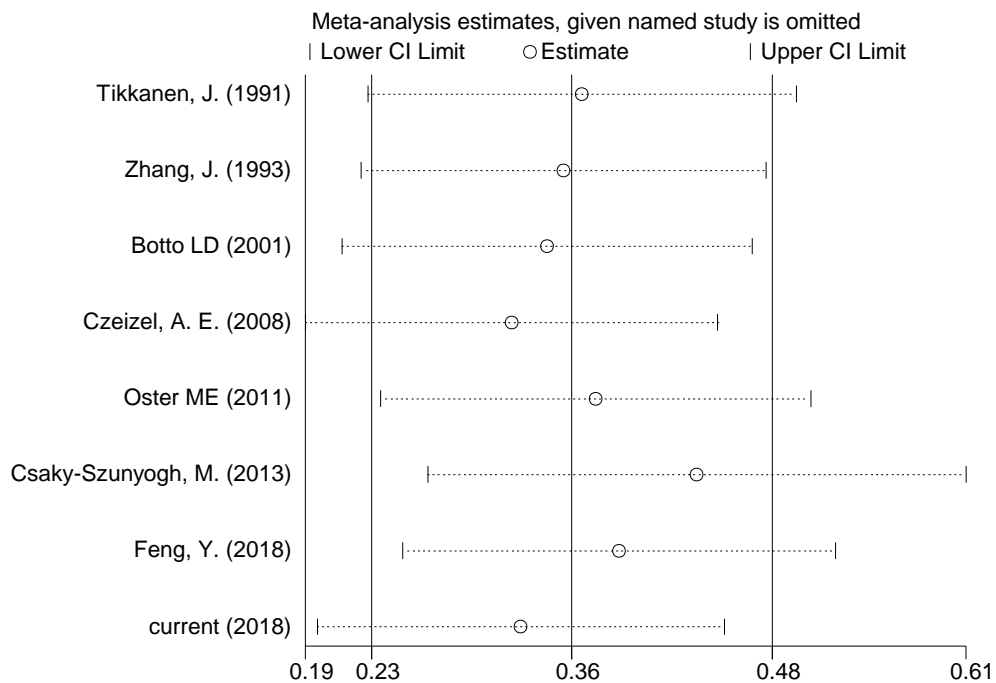

**Figure S9** Plot of sensitivity analysis for the association of maternal upper respiratory tract infection/influenza and VSD

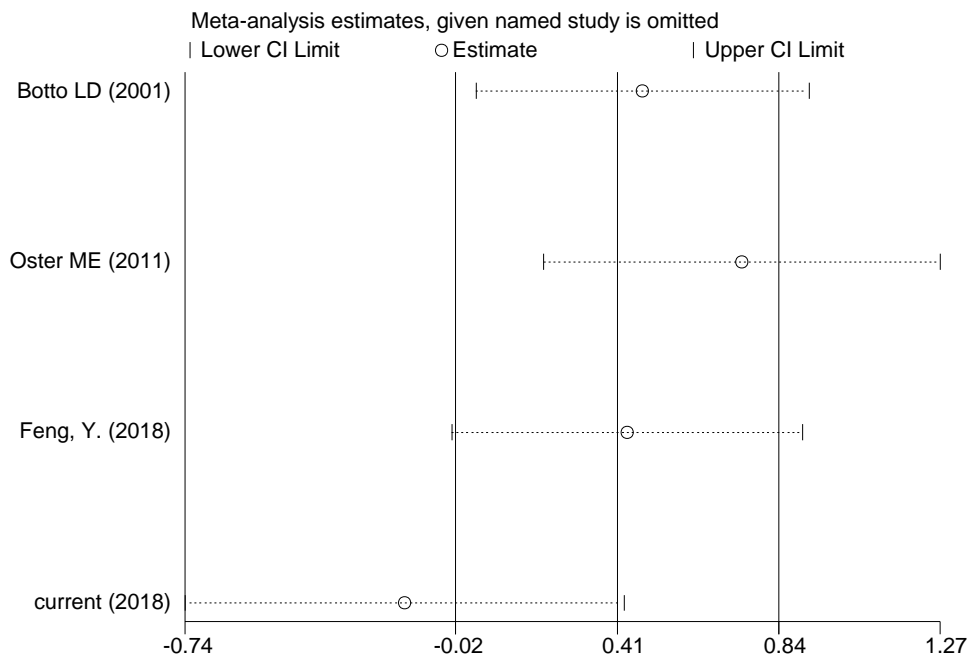

**Figure S10** Plot of sensitivity analysis for the association of maternal upper respiratory tract infection/influenza and TOF
